# Supplementary material for: Carotenoids, Vitamin C, and Antioxidant Capacity in the Peel of Mandarin Fruit in Relation to the Susceptibility to Chilling Injury during Postharvest Cold Storage
Source: MDPI journal article supplement (doi:10.3390/antiox9121296), 2020-12-17
Supplement: s1 [file s1]

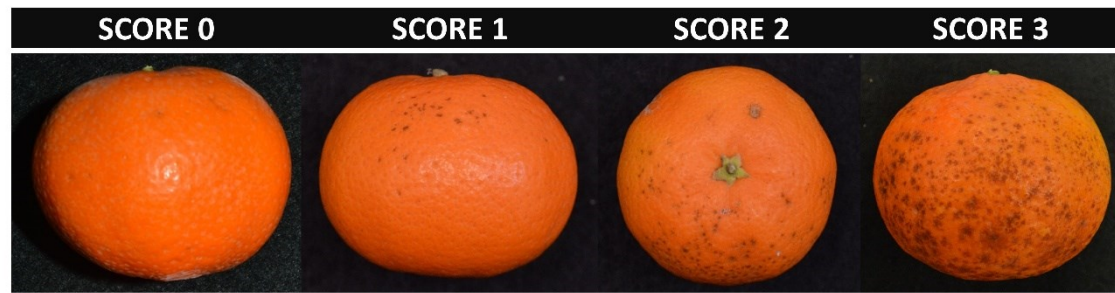

**Figure S1.** Pictures of the scale used to rate the severity of CI symptoms during postharvest cold storage. Score 0: no pitting; Score 1: small pits covering <25 % of the fruit surface; Score 2: larger and darker pits covering between 25-50 % of the surface; and Score 3: severe damage covering >50 % of the surface.

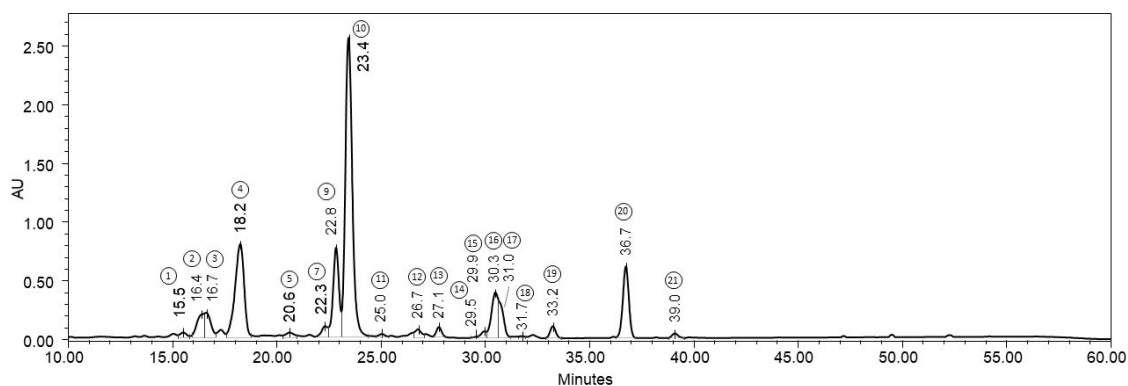

**Figure S2.** MaxPlot chromatogram of the saponified carotenoid extract of the Nadorcott flavedo at harvest. Peaks correspond to (1) NI (327(Z), 411,433,461); (2) NI (327(Z), 405,428,456); (3) NI (328(Z), 409,431,458); (4) All-*E*-violaxanthin; (5) Luteoxanthin; (7) NI (415,438,469); (9)  $\beta$ -citraurin; (10) 9-*Z*-violaxanthin; (11) Luteoxanthin isomer; (12) Lutein; (13) NI (410,435,464); (14) Zeaxanthin; (15) Mutatoxanthin; (16) Antheraxanthin; (17) 15-*Z*-Phytoene; (18) NI (sh,446,470); (19) Phytofluene; (20)  $\beta$ -cryptoxanthin; and (21)  $\zeta$ -carotene. Missing peaks in the chromatogram but present in Table S1 are carotenoids not present in this specific sample (i.e. peak 6, 8 and 22). Peaks not numbered in the chromatogram do not show the absorbance carotenoid-type spectrum.

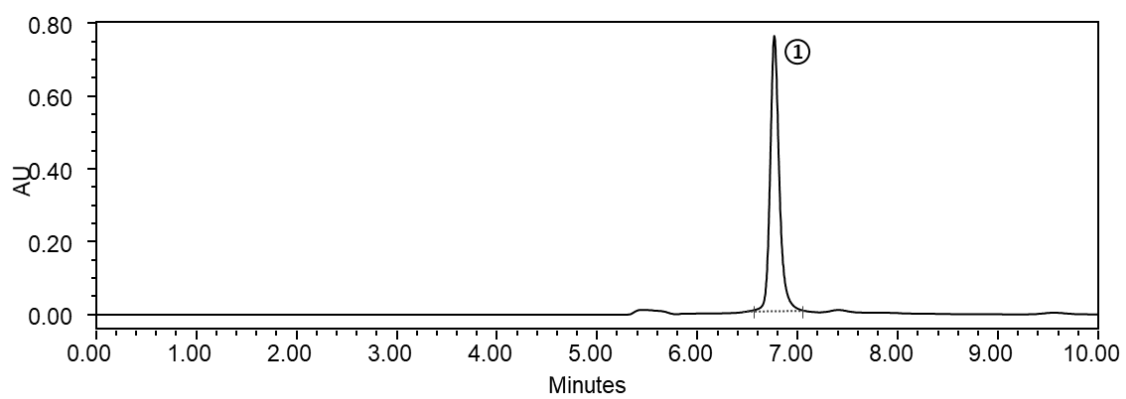

**Figure S3.** HPLC chromatogram at 248 nm showing ascorbic acid peak (1).

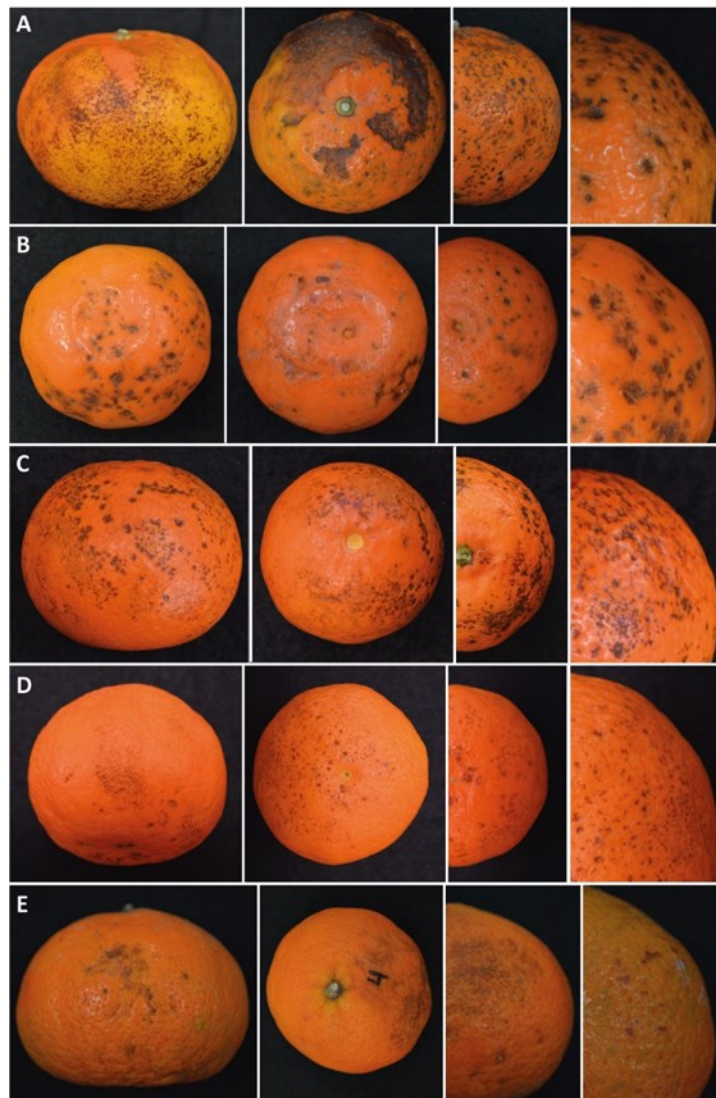

**Figure S4.** Pictures illustrating CI symptoms severity and magnification of CI development in fruit of Fortune non-covered (**A**) and covered (**B**), Nova non-covered (**C**) and covered (**D**), and covered fruit of Nadorcott (**E**).

**Table S1.** Carotenoid quantification parameters. Carotenoids were quantified by HPLC-PAD by integration of the peaks in MaxPlot chromatograms (Waters Empower Software). Violaxanthin isomers, luteoxanthin and other xanthophylls not specified were quantified using (all-*E*)-violaxanthin (CaroteNature).  $\beta$ -Citraurin was quantified using  $\beta$ -apo-8'-carotenal (Extrasynthese). Standards of lutein, zeaxanthin and  $\beta$ -cryptoxanthin were purchase from Extrasynthese, and antheraxanthin from CaroteNature. Phytoene and phytofluene were HPLC-purified from sweet orange Pinalate extracts [36] and used as standards for quantification. The concentrations of (Z)-isomers were determined using the corresponding (all-*E*) xanthophylls. The limits of detection (LOD) and working linear range are indicated for lutein, violaxanthin, antheraxanthin, zeaxanthin,  $\beta$ -cryptoxanthin, phytoene, phytofluene,  $\beta$ -apo-8'-carotenal.

| Carotenoid                | LOD <sup>a</sup> | Working linear range (mg/L) |
|---------------------------|------------------|-----------------------------|
| Phytoene                  | 25               | 1.52 to 350                 |
| Phytofluene               | 20               | 1.21 to 200                 |
| $\beta$ -Cryptoxanthin    | 10               | 0.55 to 99                  |
| Zeaxanthin                | 14               | 0.72 to 85                  |
| Antheraxanthin            | 11               | 0.54 to 102                 |
| Violaxanthin              | 14               | 0.76 to 98                  |
| Lutein                    | 15               | 0.21 to 120                 |
| $\beta$ -apo-8'-carotenal | 14               | 0.82 to 60                  |

<sup>a</sup> The LOD was calculated as the amount (in ng) load on column at which the signal level of the carotenoid reaches at least 3 times the signal noise of the baseline.

**Table S2.** Chromatographic and spectroscopic characteristics of carotenoids found in the flavedo of the three mandarin cultivars.

| Peak                                                                                                                                                                                                                                                  | Retention time (min) | Carotenoid <sup>a</sup>      | UV-Vis absorption maxima (nm) | D <sub>B</sub> /D <sub>II</sub> <sup>b</sup> |
|-------------------------------------------------------------------------------------------------------------------------------------------------------------------------------------------------------------------------------------------------------|----------------------|------------------------------|-------------------------------|----------------------------------------------|
| 1                                                                                                                                                                                                                                                     | 15.5                 | NI                           | 327(Z), 411, 433, 461         | 0.31                                         |
| 2                                                                                                                                                                                                                                                     | 16.4                 | NI                           | 327(Z), 405, 428, 456         | 0.26                                         |
| 3                                                                                                                                                                                                                                                     | 16.7                 | NI                           | 328(Z), 409, 431, 458         | 0.34                                         |
| 4                                                                                                                                                                                                                                                     | 18.2                 | *All- <i>E</i> -violaxanthin | 415, 438, 468                 |                                              |
| 5                                                                                                                                                                                                                                                     | 20.6                 | Luteoxanthin                 | 396, 421, 448                 |                                              |
| 6                                                                                                                                                                                                                                                     | 21.2                 | NI <sup>F, N</sup>           | sh, 425, 450                  |                                              |
| 7                                                                                                                                                                                                                                                     | 22.3                 | NI                           | 415, 438, 469                 |                                              |
| 8                                                                                                                                                                                                                                                     | 22.6                 | NI <sup>F</sup>              | 409, 431, 459                 |                                              |
| 9                                                                                                                                                                                                                                                     | 22.8                 | β-citraurin                  | 459                           |                                              |
| 10                                                                                                                                                                                                                                                    | 23.4                 | *9- <i>Z</i> -violaxanthin   | 328(Z), 412, 436, 464         | 0.06                                         |
| 11                                                                                                                                                                                                                                                    | 25.0                 | Luteoxanthin isomer          | 398, 416, 443                 |                                              |
| 12                                                                                                                                                                                                                                                    | 26.7                 | *Lutein                      | sh, 443, 472                  |                                              |
| 13                                                                                                                                                                                                                                                    | 27.1                 | NI                           | 410, 435, 464                 |                                              |
| 14                                                                                                                                                                                                                                                    | 29.5                 | *Zeaxanthin                  | sh, 450, 475                  |                                              |
| 15                                                                                                                                                                                                                                                    | 29.9                 | Mutatoxanthin                | sh, 427, 450                  |                                              |
| 16                                                                                                                                                                                                                                                    | 30.3                 | *Antheraxanthin              | 329(Z), sh, 441, 469          | 0.06                                         |
| 17                                                                                                                                                                                                                                                    | 31.0                 | *15- <i>Z</i> -Phytoene      | 285                           |                                              |
| 18                                                                                                                                                                                                                                                    | 31.7                 | NI <sup>N, Na</sup>          | sh, 446, 470                  |                                              |
| 19                                                                                                                                                                                                                                                    | 33.2                 | *Phytofluene                 | 331,346,364                   |                                              |
| 20                                                                                                                                                                                                                                                    | 36.7                 | *β-cryptoxanthin             | 423,450,479                   |                                              |
| 21                                                                                                                                                                                                                                                    | 39.0                 | *ζ-carotene                  | 378, 399 ,424                 |                                              |
| 22                                                                                                                                                                                                                                                    | 43.5                 | NI <sup>N, Na</sup>          | sh, 450, 480                  |                                              |
| <sup>a</sup> *, identified using authentic standards; NI, not identified; <sup>F</sup> , only in Fortune; <sup>N</sup> , only in Nova; <sup>Na</sup> , only in Nadorcott. <sup>b</sup> Intensity of Z peak as ratio D <sub>B</sub> /D <sub>II</sub> . |                      |                              |                               |                                              |
